# Supplementary material for: Regulation of the inter-relationship between the dispersion of Ni and suitable SAPO-11 acidity via solid-state synthesis in n-hexane hydroisomerization
Source: Royal Society of Chemistry journal article supplement (doi:10.1039/d4nj04760e), 2025-01-01
Supplement: d4nj04760e1.pdf [file d4nj04760e1.pdf]

# Regulation of Inter-relationship Between Dispersion of Ni and Suitable SAPO-11 Acidity via Solid-state Synthesis in n-hexane Hydroisomerization

Lijun Wang, Yujia Wang,\* Tao Jiang, Weiwei Tai, Na Sun and Qiao Han\*

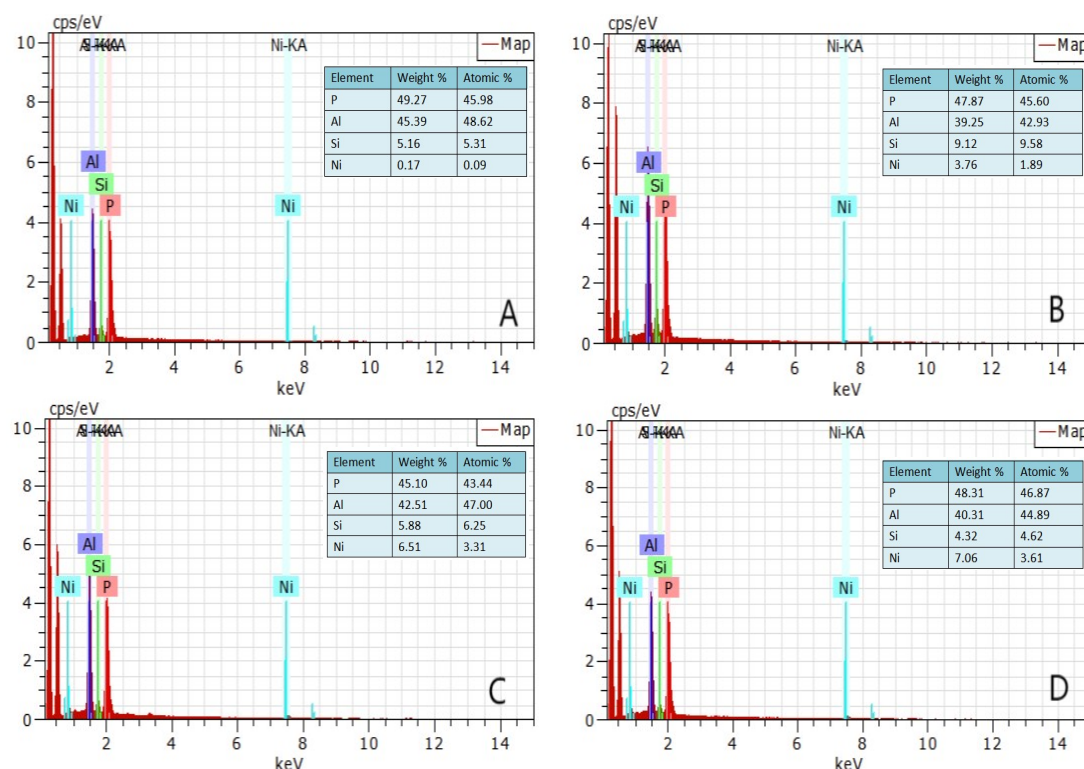

**Fig. S1** Mapping and EDS of Ni/SAPO-11 catalysts (A: NiS11-N1; B: NiS11; C: NiS11-N3; D: NiS11-N4) with different Ni/Al ratios.
